# Supplementary material for: Design of base metal extractants. Part 1. Inter-ligand hydrogen bonding in the assembly of pseudo-macrocyclic bis(aminosulfonamidato)M(ii) complexes
Source: Royal Society of Chemistry journal article supplement (doi:10.1039/b515650p), 2006-01-01
Supplement: b515650p.pdf [file b515650p.pdf]

**Design of base metal extractants. Part 1. Inter-ligand hydrogen bonding in the assembly of *pseudo*-macrocyclic bis(aminosulfonamidato)M(II) complexes.**

Clare Squires,<sup>a</sup> Christopher W. Baxter,<sup>a</sup> John Campbell,<sup>b</sup> Leonard F. Lindoy,<sup>\*c</sup> Hamish McNab,<sup>a</sup> Andrew Parkin,<sup>a</sup> Simon Parsons,<sup>a</sup> Peter A. Tasker,<sup>\*a</sup> Gang Wei<sup>c</sup> and David J. White.<sup>a</sup>

<sup>a</sup> *School of Chemistry, The University of Edinburgh, Edinburgh, EH9 3JJ. E-mail: p.a.tasker@ed.ac.uk.*

<sup>b</sup> *Cytec Industries Ltd., Blackley, Manchester, M9 8ZS*

<sup>c</sup> *Centre for Heavy Metals Research, School of Chemistry F11, University of Sydney, N.S.W., 2006, Australia*

*N*-[*N*-(2-Ethylhexyl)-2-aminoethyl]-4-methylbenzenesulfonamide (**4**) was similarly prepared from **1** and 2-ethylhexanal as a colourless oil (88%), (Found: C, 62.3; H, 10.0; N, 8.6. Calc. for C<sub>17</sub>H<sub>30</sub>N<sub>2</sub>O<sub>2</sub>S: C, 62.39; H, 9.47; N, 8.56),  $\delta_{\text{H}}$  (CDCl<sub>3</sub>, 360 MHz): 0.84 (t, 3 H, J 7.2, CH<sub>3</sub>), 0.92 (t, 3 H, J 7.0, CH<sub>3</sub>), 1.27 (m, 8 H, CH<sub>2</sub>), 2.35 (d, 2 H, J 5.6, CH<sub>2</sub>), 2.45 (s, 3 H, CH<sub>3</sub>), 2.69 (t, 2 H, J 5.6, CH<sub>2</sub>), 3.00 (t, 2 H, J 5.6, CH<sub>2</sub>), 7.32 (d, 2 H, J 7.9, Ar CH), 7.78 (d, 2 H, J 8.3, Ar CH),  $\delta_{\text{C}}$  (CDCl<sub>3</sub> 63 MHz): 11 (CH<sub>3</sub>), 14 (CH<sub>3</sub>), 21 (CH<sub>3</sub>), 23 (CH<sub>2</sub>), 24 (CH<sub>2</sub>), 29 (CH<sub>2</sub>), 31 (CH<sub>2</sub>), 39 (CH), 42 (CH<sub>2</sub>), 52 (CH<sub>2</sub>), 127 (2 C, Ar CH), 129 (2 C, Ar CH), 137 (Ar C), 143 (Ar C), IR (NaCl)/cm<sup>-1</sup>: 661s, 815s, 1034m, 1094s, 1158s, 1304s, 1458s, 1599m, 2873s, 2958s, 3286m, ESI MS, *m/z* 327 (MH<sup>+</sup>, 100.0%)

*N*-(3-Aminopropyl)-4-*tert*-butylbenzenesulfonamide (**6**) was obtained from 1,3-diaminopropane by the procedure used for **2** as a white crystalline solid after recrystallisation from water and drying *in vacuo* (24%), mp 226 °C (Found: C, 50.4; H, 6.7; N, 12.8. Calc. for C<sub>13</sub>H<sub>22</sub>N<sub>2</sub>O<sub>2</sub>S: C, 50.45; H, 6.59; N, 13.07%),  $\delta_{\text{H}}$  (CDCl<sub>3</sub>, 200 MHz): 1.30 (s, 9 H, CH<sub>3</sub>), 1.59 (tt, 2 H, J 6.2, CH<sub>2</sub>), 2.80 (t, 2 H, J 6.1, CH<sub>2</sub>), 3.07 (t, 2 H, J 6.3, CH<sub>2</sub>), 7.50 (d, 2 H, J 8.8, Ar CH), 7.77 (d, 2 H, J 8.8, Ar CH),  $\delta_{\text{C}}$  (DMSO-*d*<sub>6</sub>, 63 MHz): 30 (CH<sub>2</sub>), 31 (3 C, CH<sub>3</sub>), 35 (Ar C(CH<sub>3</sub>)<sub>3</sub>), 38 (CH<sub>2</sub>), 38 (CH<sub>2</sub>), 126 (2 C, Ar CH), 126 (2 C, Ar CH), 138 (Ar C), 155 (Ar C), IR (KBr disc)/cm<sup>-1</sup>: 2961s, 1596m, 1542w, 1465m, 1329s, 1156s, FAB MS, *m/z* 271 (MH<sup>+</sup>, 100.0%).

*N*-(*N*-Benzyl-3-aminopropyl)-4-methylbenzenesulfonamide (**7**) was obtained by the procedure described for **3** from benzaldehyde and **5** as a white crystalline solid after recrystallisation from ethanol (38%), mp 82-84 °C (Found: C, 63.9; H, 6.8; N, 8.8. Calc. for C<sub>17</sub>H<sub>22</sub>N<sub>2</sub>O<sub>2</sub>S: C, 64.10; H, 6.96; N, 8.80%),  $\delta_{\text{H}}$  (CDCl<sub>3</sub>, 200 MHz) 1.61 (tt, 2 H, J 6.0, CH<sub>2</sub>), 2.40 (s, 3 H, CH<sub>3</sub>), 2.65 (t, 2 H, J 5.9, CH<sub>2</sub>), 3.03 (t, 2 H, J 6.0, CH<sub>2</sub>), 3.69 (s, 2 H, CH<sub>2</sub>), 7.27 (m, 7 H, Ar CH), 7.70 (d, 2 H, J 8.3, Ar CH),  $\delta_{\text{C}}$  (CDCl<sub>3</sub>, 50 MHz) 21 (CH<sub>3</sub>), 28 (CH<sub>2</sub>), 43 (CH<sub>2</sub>), 48 (CH<sub>2</sub>), 54 (CH<sub>2</sub>), 127 (2 C, Ar CH), 127 (Ar CH), 128 (2 C, Ar CH), 128 (2 C, Ar CH), 129 (2 C, Ar CH), 137 (Ar C), 140 (Ar C), 143 (Ar C), IR (KBr disc)/cm<sup>-1</sup>: 1156s, 1185w, 1326s, 1454m, 1477m, 1497m, 1598m, 2832s, 2873w, 2933w, 2964w, 3059m, 3467w, FAB MS, *m/z* 319 (MH<sup>+</sup>, 100%).

*N*-[*N*-(2-Ethylhexyl)-3-aminopropyl]-4-methylbenzenesulfonamide (**8**) was obtained by the procedure described for **3** from 2-ethylhexanal and **5** as a colourless oil (66%),

(Found: C, 63.5; H, 9.6; N, 8.2. Calc. for C<sub>18</sub>H<sub>32</sub>N<sub>2</sub>O<sub>2</sub>S: C, 63.49; H, 9.47; N, 8.22%),  
 $\delta_{\text{H}}$  (CDCl<sub>3</sub>, 360 MHz): 0.90 (t, 3 H, J 7.3, CH<sub>3</sub>), 0.93 (t, 3 H, J 6.7, CH<sub>3</sub>), 1.62 (t, 2 H, J 5.5, CH<sub>2</sub>), 2.67 (t, 2 H, J 5.6, CH<sub>2</sub>), 2.45 (s, 5 H, CH<sub>2</sub>, CH<sub>3</sub>), 3.08 (t, 2 H, J 5.7, CH<sub>2</sub>), 5.90 (m, 9 H, CH, 3 x CH<sub>2</sub>), 7.32 (d, 2 H, J 8.1, Ar CH), 7.76 (d, 2 H, J 8.1, Ar CH),  $\delta_{\text{C}}$  (CDCl<sub>3</sub>, 90 MHz): 11 (CH<sub>3</sub>), 14 (CH<sub>3</sub>), 21 (CH<sub>3</sub>), 23 (CH<sub>2</sub>), 24 (CH<sub>2</sub>), 29 (CH<sub>2</sub>), 31 (CH<sub>2</sub>), 39 (CH), 42 (CH<sub>2</sub>), 52 (CH<sub>2</sub>), 127 (2 C, Ar CH), 129 (2 C, Ar CH), 137 (Ar C), 143 (Ar C), IR (NaCl)/cm<sup>-1</sup>: 515s, 659s, 1036m, 1095s, 1164s, 1328s, 1458s, 1496m, 1599m, 2362w, 2873s, 2928s, 3292m, ESI MS, m/z 341 (MH<sup>+</sup>, 100.0%).

*N*-(*N*-Butyl-3-aminopropyl)-4-methylbenzenesulfonamide (**9**) was obtained by the procedure described for **3** from *n*-butanal and **5** as a sticky white solid which proved difficult to purify. Crystals suitable for X-ray structure determination separated directly from the oil obtained after evaporation of methanol for 5 days,  $\delta_{\text{H}}$  (CDCl<sub>3</sub>, 250 MHz): 0.91 (t, 3 H, J 7.1, CH<sub>3</sub>), 1.46 (m, 6 H, CH<sub>2</sub>), 2.41 (s, 3 H, CH<sub>3</sub>), 2.53 (t, 2 H, J 7.0, CH<sub>2</sub>), 2.68 (t, 2 H, J 5.8, 2 H, CH<sub>2</sub>), 3.05 (t, 2 H, J 5.9, CH<sub>2</sub>), 7.29 (d, 2 H, J 8.0, Ar CH), 7.73 (d, 2 H, J 8.3, Ar CH), EI MS, m/z 285 (MH<sup>+</sup>, 100.0%).

*N*-(2-Aminophenyl)-4-methylbenzenesulfonamide (**10**) was prepared by the method of Cheng *et al.*<sup>8</sup>

*N*-(2-Aminophenyl)-4-*tert*-butylbenzenesulfonamide (**11**) was prepared by an adaptation of the method for **10**. A solution of 4-*tert*-butylbenzenesulfonyl chloride (5.35 g, 23 mmol) in pyridine (50 cm<sup>3</sup>) was added dropwise to a solution of 1,2-diaminobenzene

(7.25 g, 67 mmol) in pyridine (100 cm<sup>3</sup>) over 8 hours. The mixture was quenched with hydrochloric acid (15% aq, 300 cm<sup>3</sup>), poured onto ice (500 g), and the resulting pale brown precipitate collected, dried and recrystallised from ethanol (100 cm<sup>3</sup>) to give **11** as a white crystalline solid (3.30 g, 47%), mp 135-136°C (Found: C, 63.2; H, 6.6; N, 9.2. Calc. for C<sub>16</sub>H<sub>20</sub>N<sub>2</sub>O<sub>2</sub>S: C, 63.13; H, 6.62; N, 9.20 %),  $\delta_{\text{H}}$  (CDCl<sub>3</sub>, 200 MHz): 1.31 (s, 9 H, CH<sub>3</sub>), 4.02 (s, 2 H, NH<sub>2</sub>), 6.49-6.52 (m, 2 H, Ar CH), 6.69 (s, 1 H, NH), 6.70-6.73 (m, 1 H, Ar CH), 6.98-7.05 (m, 1 H, Ar CH), 7.44 (d, 2 H, J 8.8, Ar CH), 7.66 (d, 2 H, J 8.8, Ar CH),  $\delta_{\text{C}}$  (CDCl<sub>3</sub>, 63 MHz): 31 (3C, CH<sub>3</sub>), 35 (Ar C(CH<sub>3</sub>)<sub>3</sub>), 117 (Ar, CH), 118 (Ar, CH), 121 (Ar C), 126 (Ar, CH), 127 (Ar, CH), 128 (Ar, CH), 129 (Ar, CH), 136 (Ar C), 144 (Ar C), 157 (Ar C), IR (KBr disc)/cm<sup>-1</sup>: 3465m, 3387s, 2965s, 2869m, 1625s, 1597s, 1464s, 1324s, FAB MS, *m/z* 305 (MH<sup>+</sup>, 100.0%).

Bis[*N*-(2-aminoethyl)-4-methylbenzenesulfonamidato]cobalt(II) (**14**) was prepared using the same procedure as for **13** from cobalt(II) acetate tetrahydrate as a brown crystalline solid (46%), (Found: C, 44.5; H, 5.4; N, 11.4. Calc. for C<sub>18</sub>H<sub>26</sub>N<sub>4</sub>CoO<sub>4</sub>S<sub>2</sub>: C, 44.53; H, 5.40; N, 11.54%), IR (KBr disc)/cm<sup>-1</sup>: 1158m, 1372w, 1583m, 1626m, 2966w, 292w, 3683w, 3289s, 3448m. FAB MS, *m/z* 486 (MH<sup>+</sup>, 54.1%).

Bis[*N*-(2-aminoethyl)-4-*tert*-butylbenzenesulfonamidato]copper(II) (**16**) was prepared from **2** in a similar manner to **15** as a purple crystalline solid (59%). Crystals suitable for X-ray structure determination were obtained by the diffusion of diethyl ether into a concentrated solution in methanol, (Found: C, 50.2; H, 6.8; N, 9.6. Calc. for

$C_{24}H_{38}N_4CuO_4S_2$ : C, 50.02; H, 7.00; N, 9.72%), IR (KBr disc)/ $cm^{-1}$ : 835m, 981m, 1129m, 1252s, 1655m, 1686m, 2986m, 3632m, ESI MS,  $m/z$  574 ( $MH^+$ , 65.0%).

Bis{*N*-[*N*-(2-ethylhexyl)-2-aminoethyl]-4-methylbenzenesulfonamidato}cobalt(II) (**18**) was prepared in a similar manner to **17** from cobalt(II) acetate tetrahydrate as a purple solid (32%), IR (KBr disc)/ $cm^{-1}$ : 668w, 1161w, 1332w, 1412w, 1560s, 2361w, 2961w, 3464m, FAB MS,  $m/z$  709 ( $MH^+$ , 96.0%), HRMS  $m/z$  calc. for  $C_{34}H_{59}N_4CoO_4S_2$  710.3309, found 710.3314.

Bis{*N*-[*N*-(2-ethylhexyl)-2-aminoethyl]-4-methylbenzenesulfonamidato}copper(II) (**19**) was prepared in a similar manner to **17** from copper(II) acetate monohydrate as a purple solid (51%), (Found: C, 57.10; H, 8.14; N, 7.80. Calc. for  $C_{34}H_{58}N_4CuO_4S_2$ : C, 57.15; H, 8.18; N, 7.84%). IR data (KBr disc)/ $cm^{-1}$ : 667s, 1136s, 1274m, 1558s, 1685m, 2343m, 2362m, 2929m, 3447m. FAB MS,  $m/z$  714 ( $MH^+$ , 10.1%).

Bis[*N*-(2-aminopropyl)-4-methylbenzenesulfonamidato]cobalt(II) (**20**) was prepared in a similar manner to **15** from **5** and cobalt(II) acetate tetrahydrate, collecting the purple crystals after 3 days, washing with methanol (3 x 5  $cm^3$ ) and drying *in vacuo* (36%), (Found: C, 46.5; H, 6.1; N, 10.6. Calc. for  $C_{20}H_{30}N_4CoO_4S_2$ : C, 46.78; H, 5.89; N, 10.91%), IR (KBr disc)/ $cm^{-1}$ : 709w, 1134s, 1684w, 3332m, 2929w, 2878w, 2846w, ESI MS,  $m/z$  514 ( $MH^+$ , 6.3%).

Bis[*N*-(2-aminopropyl)-4-methylbenzenesulfonamidato]zinc(II) (**23**) was prepared by the procedure for **20** using zinc(II) acetate dihydrate as white crystals (38%), (Found: C, 46.1; H, 5.4; N, 10.8. Calc. for C<sub>20</sub>H<sub>30</sub>N<sub>4</sub>O<sub>4</sub>S<sub>2</sub>Zn: C, 46.20; H, 5.82; N, 10.78%), IR (KBr disc)/cm<sup>-1</sup>: 709w, 1173m, 1590m, 1653w, 2848w, 2884w, 2934w, 3340m, ESI MS, *m/z* 519 (MH<sup>+</sup>, 10.9%).

Bis[*N*-(2-aminophenyl)-4-methylbenzenesulfonamidato]nickel(II) (**25**) was prepared by the procedure for **15** from **10** and nickel(II) acetate tetrahydrate as a pale green solid (93%), (Found: C, 53.7; H, 4.4; N, 9.6. Calc. for C<sub>26</sub>H<sub>26</sub>N<sub>4</sub>NiO<sub>4</sub>S<sub>2</sub>: C, 53.63; H, 4.50; N, 9.62%), IR (KBr disc)/cm<sup>-1</sup>: 706w, 1163w, 1493s, 1599m, 3025w, 3448m, FAB MS, *m/z* 581 (MH<sup>+</sup>, 7.2%).

Bis[*N*-(2-aminophenyl)-4-methylbenzenesulfonamidato]zinc(II) (**27**) was prepared as described for **25** using zinc(II) acetate dihydrate as white crystals (45%), (Found: C, 52.9; H, 4.56; N, 9.5. Calc. for C<sub>26</sub>H<sub>26</sub>N<sub>4</sub>O<sub>4</sub>S<sub>2</sub>Zn: C, 53.11; H, 4.46; N, 9.53%), IR (KBr disc)/cm<sup>-1</sup>: 707w, 1160w, 1197w, 1264s, 1306s, 1542w, 1601m, 3035w, 3065w, 3259s, 3335s, FAB MS, *m/z* 587 (MH<sup>+</sup>, 5.7%).

List of all hydrogen bonds observed in crystal structures with  $H..A < r(A) + 2.000$  Angstroms  
 and  $\langle DHA \rangle > 110$  deg.

| D-H       | d(D-H) | d(H..A) | $\langle DHA \rangle$ | d(D..A) | A                           |
|-----------|--------|---------|-----------------------|---------|-----------------------------|
| <b>1</b>  |        |         |                       |         |                             |
| N3A-H3A   | 0.997  | 1.856   | 168.92                | 2.841   | N6B                         |
| N6A-H6AA  | 0.996  | 2.14    | 154.58                | 3.07    | O1B [ x-1, y+1, z ]         |
| N6A-H6AA  | 0.996  | 2.884   | 174.18                | 3.875   | S2B [ x-1, y+1, z ]         |
| N3B-H3B   | 0.978  | 1.848   | 176.05                | 2.824   | N6A [ x, y-1, z ]           |
| N6B-H6AB  | 0.974  | 2.159   | 165.09                | 3.11    | O1A [ x+1, y, z ]           |
| N6B-H6BB  | 0.951  | 2.284   | 153.28                | 3.163   | O2B [ x, y+1, z ]           |
| <b>5</b>  |        |         |                       |         |                             |
| N3A-H3A   | 0.951  | 1.959   | 173.98                | 2.906   | N7A [ -x+1, y+1/2, -z+1/2 ] |
| N7A-H7AA  | 0.945  | 2.441   | 134.42                | 3.175   | O1A [ x, y-1, z ]           |
| N7A-H7BA  | 0.867  | 2.414   | 165.41                | 3.261   | O2A [ -x+1, -y, -z ]        |
| <b>7</b>  |        |         |                       |         |                             |
| N3A-H3A   | 0.984  | 1.981   | 175.56                | 2.964   | N7A [ -x+1, -y+2, z-1/2 ]   |
| <b>9</b>  |        |         |                       |         |                             |
| N7A-H7A   | 0.846  | 2.404   | 143.32                | 3.124   | O1A [ -x+1, -y+1, -z+1 ]    |
| N3A-H3A   | 0.821  | 2.159   | 166.76                | 2.964   | N7A [ -x+1, y-1/2, -z+3/2 ] |
| <b>10</b> |        |         |                       |         |                             |
| N3A-H3A   | 0.755  | 2.066   | 174.34                | 2.819   | O2A [ -x+1, y-1/2, -z+1 ]   |
| N6A-H6BA  | 0.869  | 2.516   | 126.6                 | 3.114   | O1A                         |
| N6A-H6BA  | 0.869  | 2.966   | 126.12                | 3.549   | S2A                         |
| N3B-H3B   | 0.672  | 2.274   | 174.96                | 2.944   | O1B [ -x+1, y+1/2, -z ]     |
| N6B-H6BB  | 0.908  | 2.404   | 145.65                | 3.194   | O1B [ -x+1, y-1/2, -z ]     |
| N6B-H6BB  | 0.908  | 2.563   | 125.36                | 3.176   | O2B                         |
| N6B-H6BB  | 0.908  | 3.02    | 124.67                | 3.614   | S2B                         |
| <b>12</b> |        |         |                       |         |                             |
| N6A-H6A1  | 0.91   | 2.143   | 163.84                | 3.028   | O1M [ -x+2, -y-1, -z ]      |
| N6A-H6A2  | 0.91   | 2.32    | 125.4                 | 2.942   | O1A [ x, -y-3/2, z+1/2 ]    |
| N6B-H6B1  | 0.91   | 2.242   | 144.22                | 3.027   | O1B [ x, -y-3/2, z+1/2 ]    |
| N6B-H6B1  | 0.91   | 3.015   | 118.19                | 3.537   | S2B [ x, -y-3/2, z+1/2 ]    |
| N6B-H6B2  | 0.91   | 2.153   | 156.23                | 3.009   | O2A [ x, -y-3/2, z+1/2 ]    |
| N6B-H6B2  | 0.91   | 2.884   | 155.39                | 3.731   | S2A [ x, -y-3/2, z+1/2 ]    |
| N6C-H6C1  | 0.91   | 2.167   | 141.7                 | 2.935   | O1C [ x, -y-1/2, z+1/2 ]    |
| N6C-H6C2  | 0.91   | 1.995   | 163.34                | 2.878   | O2M                         |
| N6D-H6D1  | 0.91   | 2.305   | 157.35                | 3.165   | O2C [ x, -y-1/2, z+1/2 ]    |
| N6D-H6D1  | 0.91   | 2.989   | 160.35                | 3.858   | S2C [ x, -y-1/2, z+1/2 ]    |
| N6D-H6D2  | 0.91   | 2.2     | 155.33                | 3.051   | O2D [ x, -y-1/2, z+1/2 ]    |
| N6D-H6D2  | 0.91   | 2.93    | 129.83                | 3.582   | S2D [ x, -y-1/2, z+1/2 ]    |
| O1M-H1M   | 0.83   | 2.385   | 134.8                 | 3.028   | N6A [ -x+2, -y-1, -z ]      |
| O2M-H2M   | 0.83   | 1.967   | 158.06                | 2.755   | O2A [ -x+2, -y-1, -z ]      |
| <b>13</b> |        |         |                       |         |                             |
| N6A-H6AA  | 0.91   | 2.197   | 122.87                | 2.798   | O1A [ -x+1, -y, -z ]        |
| N6A-H6AA  | 0.91   | 2.325   | 143.27                | 3.103   | O1A [ x, y-1, z ]           |
| N6A-H6BA  | 0.91   | 2.094   | 156.16                | 2.95    | O2A [ -x+1, y-1/2, -z-1/2 ] |
| <b>16</b> |        |         |                       |         |                             |
| N6A-H6AA  | 0.92   | 2.033   | 165.28                | 2.932   | O2B [ x+1, y, z ]           |
| N6A-H6BA  | 0.92   | 2.078   | 138.65                | 2.834   | O1B                         |

Electronic Supplementary Information for Dalton Transactions  
This journal is © The Royal Society of Chemistry 2006

|          |      |       |        |       |                   |
|----------|------|-------|--------|-------|-------------------|
| N6A-H6BA | 0.92 | 2.936 | 111.36 | 3.381 | S2B               |
| N6B-H6AB | 0.92 | 2.213 | 119.69 | 2.786 | O1A               |
| N6B-H6AB | 0.92 | 2.83  | 116.7  | 3.346 | S2A               |
| N6B-H6BB | 0.92 | 2.075 | 163.78 | 2.969 | O2A [ x-1, y, z ] |
